# Supplementary material for: NaOH/urea aqueous solution facilitates spectroscopic quantitation of lignin in corn stalk
Source: Royal Society of Chemistry journal article supplement (doi:10.1039/d4cc06423b), 2025-01-01
Supplement: d4cc06423b1.pdf [file d4cc06423b1.pdf]

Supplementary Information (SI) for Chemical Communications.

This journal is © The Royal Society of Chemistry 2024

## **NaOH/Urea aqueous solution facilitates spectroscopic quantitation of lignin in corn stalk**

Kexin Yan,<sup>a</sup> Nan Li,<sup>a</sup> Qifan Tian,<sup>a</sup> Zijian Tan,<sup>a,b</sup> Qinchen Qin,<sup>a</sup> Jinao Duan,<sup>a</sup> Leilei Zhu<sup>b\*</sup> and  
Haifeng Liu<sup>a\*</sup>

- a. Jiangsu Collaborative Innovation Centre of Chinese Medicinal Resources Industrialization, School of Pharmacy, Nanjing University of Chinese Medicine, Nanjing 210023, China.
- b. Key Laboratory of Engineering Biology for Low-Carbon Manufacturing, Tianjin Institute of Industrial Biotechnology, Chinese Academy of Sciences, Tianjin 300308, China.

Email: [haifeng.liu@njucm.edu.cn](mailto:haifeng.liu@njucm.edu.cn); [zhu\\_ll@tib.cas.cn](mailto:zhu_ll@tib.cas.cn)

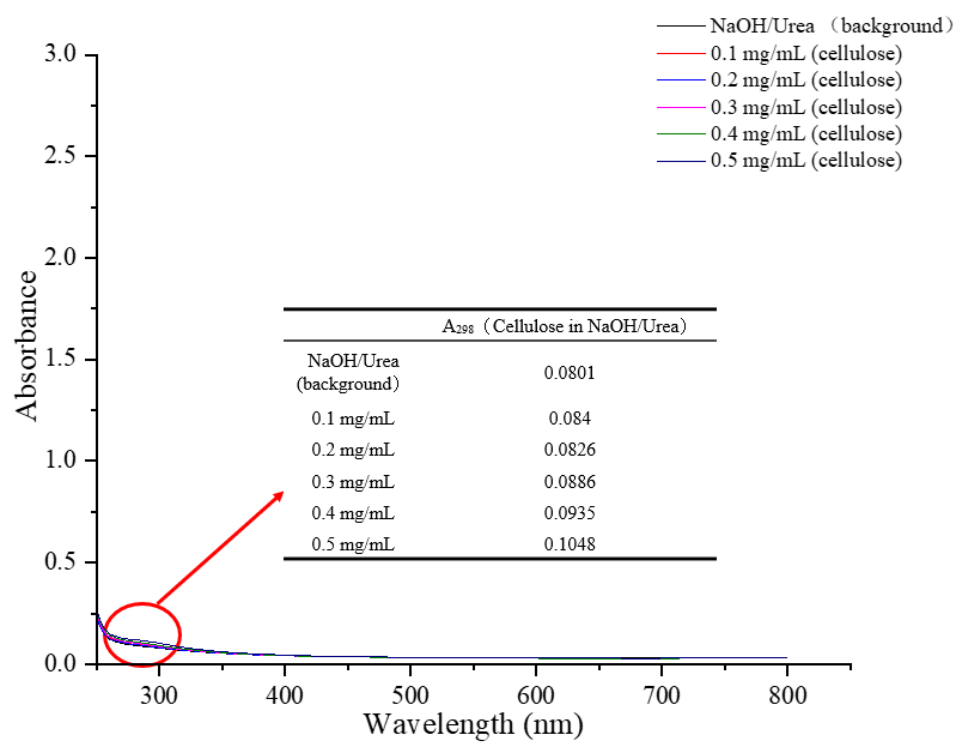

**Figure S1** Full-wavelength scanning (200-800 nm) of standard cellulose in 7% NaOH/12% urea aqueous solution.

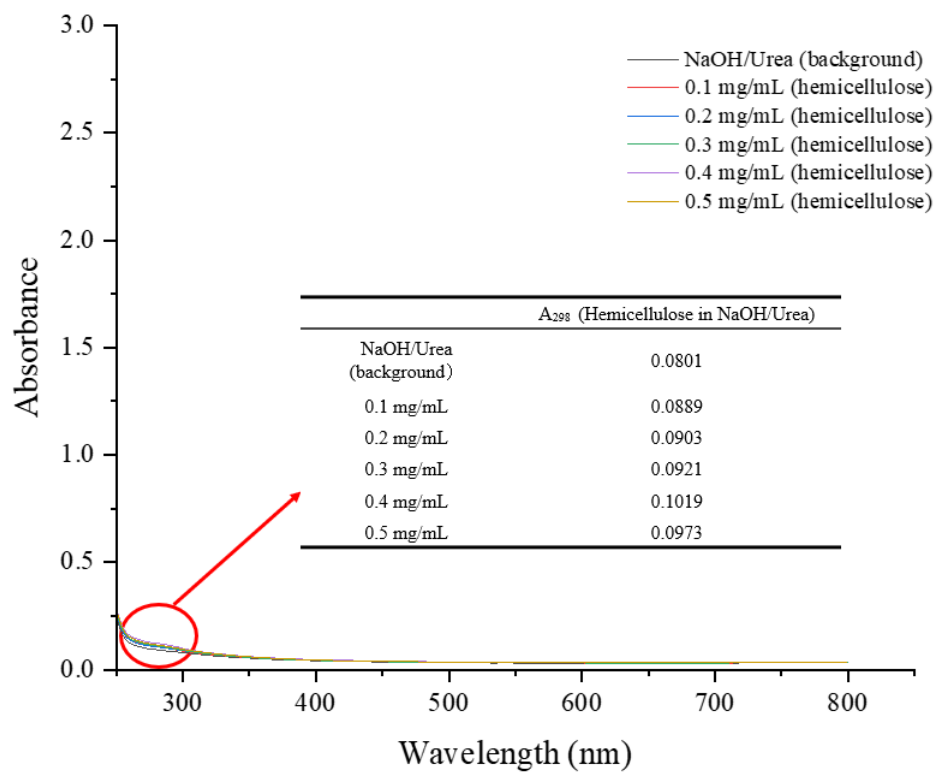

**Figure S2** Full-wavelength scanning (200-800 nm) of standard hemicellulose in 7% NaOH/12% urea aqueous solution.

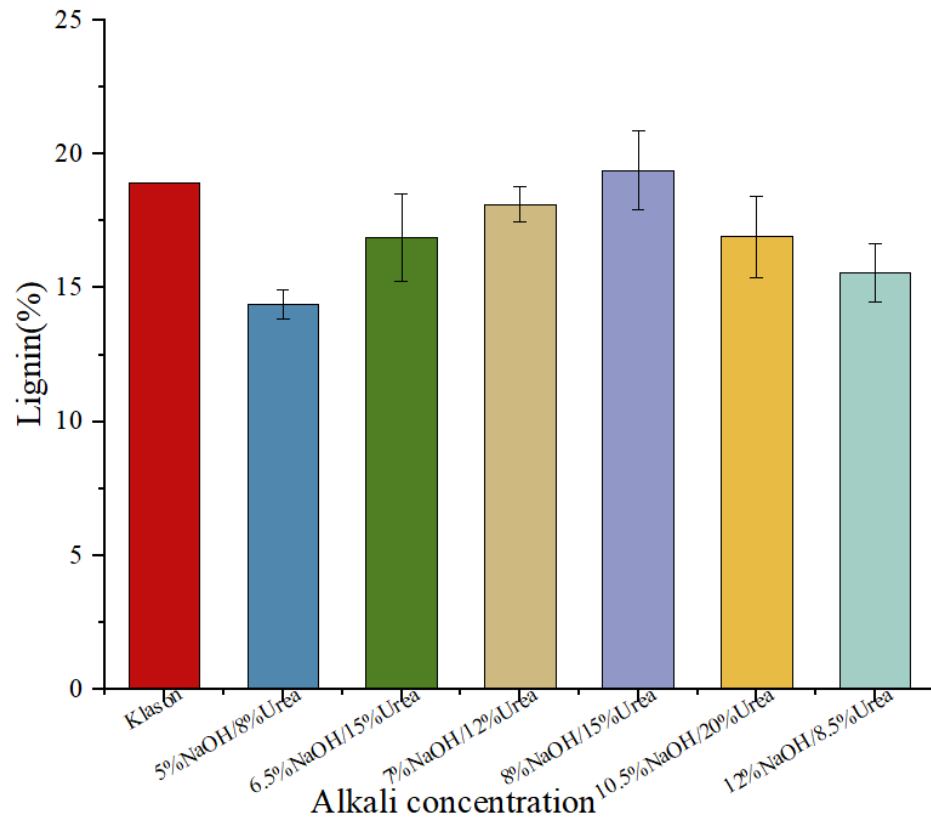

**Figure S3** The dissolution of lignin in NaOH / urea solution with different ratios.

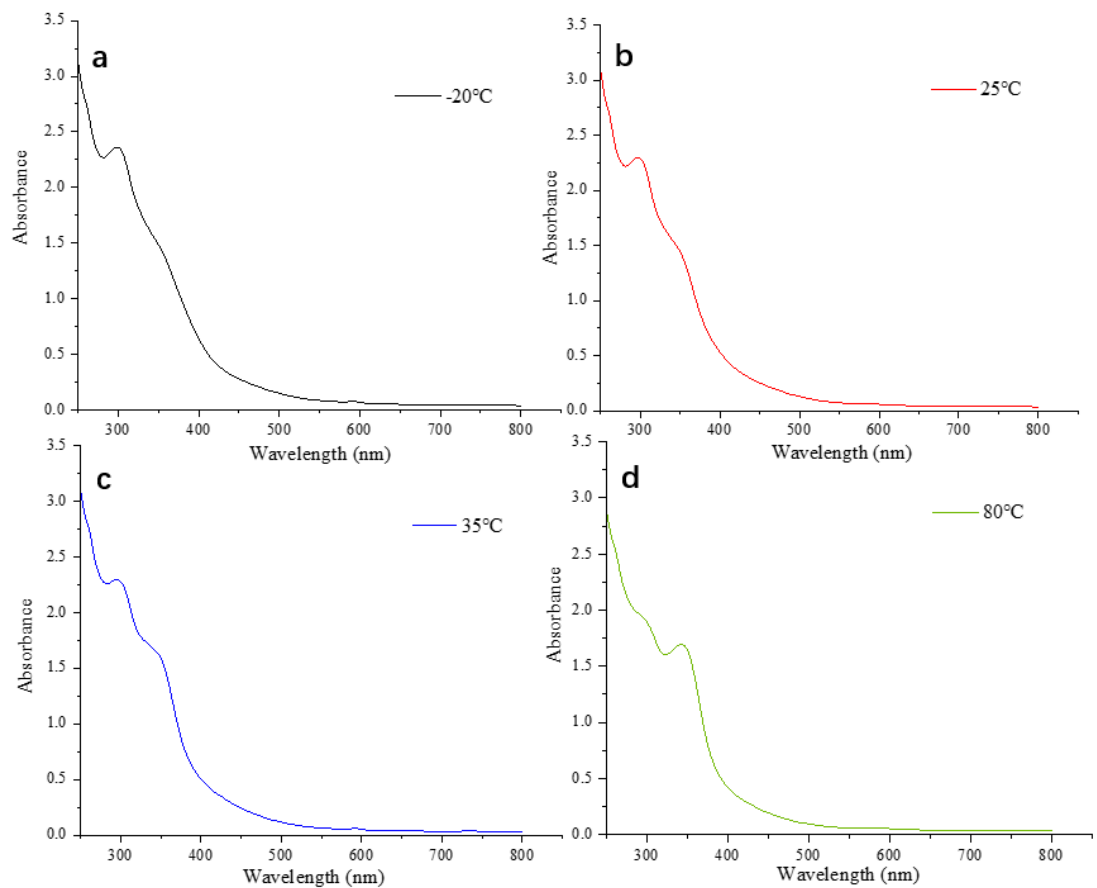

**Figure S4** Full-wavelength scanning (200-800 nm) of standard lignin in 7% NaOH/12% urea aqueous solution after incubation at different temperatures.

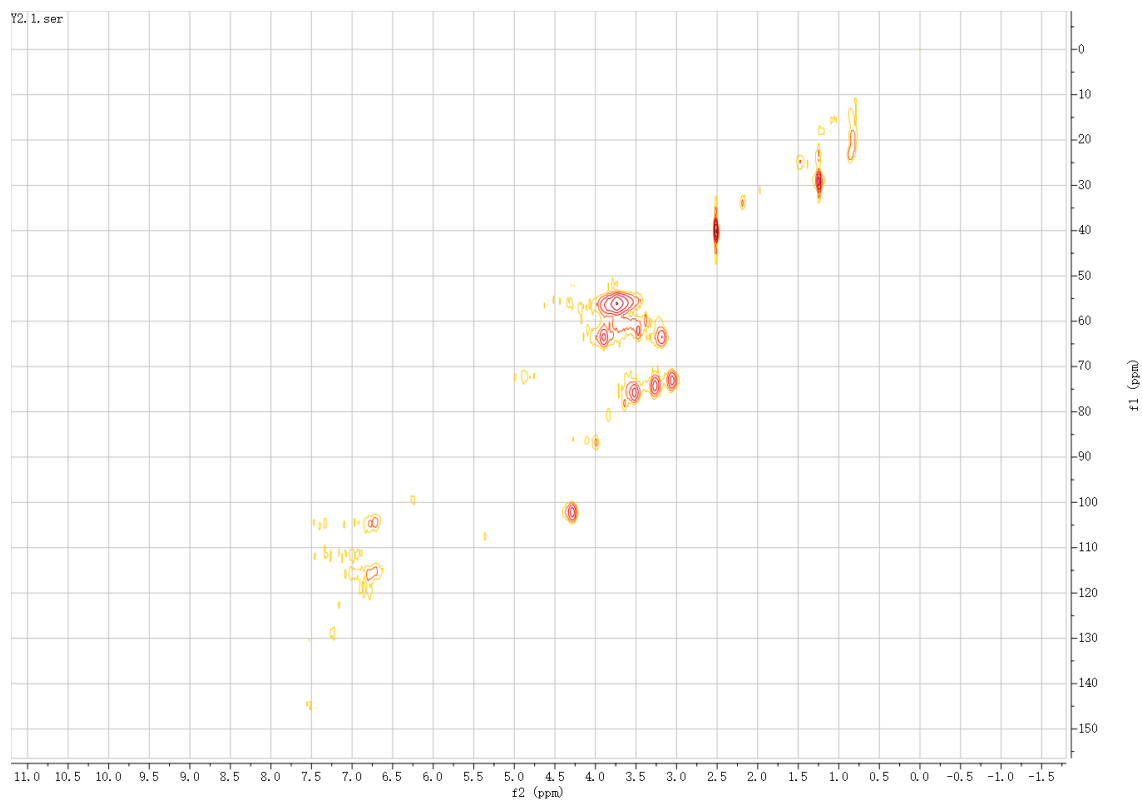

**Figure S5.** 2D-HSQC spectrum of lignin-carbohydrate complex in corn straw.

**Table S1.** Assignment of main  $^{13}\text{C}$ - $^1\text{H}$  cross-signals in HSQC spectra of lignin fractions from corn straw.

| label          | $\delta_c/\delta_H$ | assignment                                                           |
|----------------|---------------------|----------------------------------------------------------------------|
| X <sub>1</sub> | 102.2/4.28          | C <sub>1</sub> -H <sub>1</sub> in $\beta$ -D-xylopyranoside          |
| X <sub>2</sub> | 73.1/3.06           | C <sub>2</sub> -H <sub>2</sub> in $\beta$ -D-xylopyranoside          |
| X <sub>3</sub> | 74.2/3.27           | C <sub>3</sub> -H <sub>3</sub> in $\beta$ -D-xylopyranoside          |
| X <sub>4</sub> | 75.7/3.52           | C <sub>4</sub> -H <sub>4</sub> in $\beta$ -D-xylopyranoside          |
| X <sub>5</sub> | 63.5/3.18           | C <sub>5</sub> -H <sub>5</sub> in $\beta$ -D-xylopyranoside          |
| A              | 63.5/3.19           | $\beta$ -O-4'linkages                                                |
| A'             | 63.5/3.90           | C <sub><math>\alpha</math></sub> -ethoxylation $\beta$ -O-4'linkages |
